# Supplementary material
Source: PubMed Central journal article supplement (PMC3064173)
Supplement: supp_M110.186809_Fig1.pdf [file supp_M110.186809_Fig1.pdf]

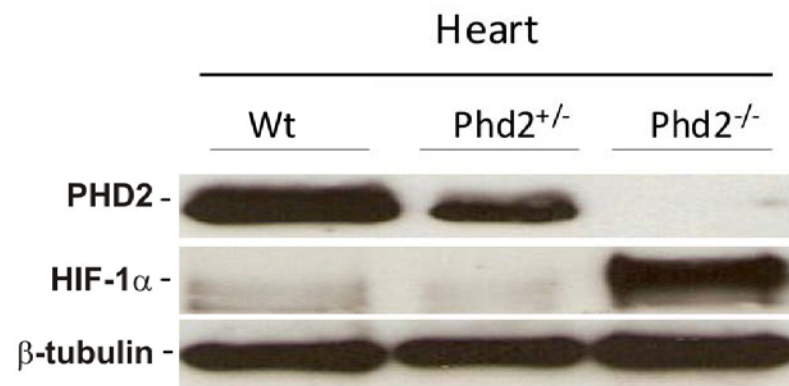

**Supplementary Figure 1:** Protein expression in the Phd 2 deficient heart. Hearts from mouse embryos (*PGKCre x Phd2<sup>flox/flox</sup>*) were isolated at E14.5 and western blot analysis was performed on protein extracts (10 μg total protein). The anti mouse-Phd2 antibody targeted the C-terminal end of the protein (homemade). No PHD2 signal could be detected in the *Phd2<sup>-/-</sup>* heart (as in the rest of the embryo (data not shown)) resulting in the protection of HIF-1α protein from degradation. β-tubulin served as loading control.
