# Supplementary material
Source: PubMed Central journal article supplement (PMC3064173)
Supplement: supp_M110.186809_Fig2.pdf [file supp_M110.186809_Fig2.pdf]

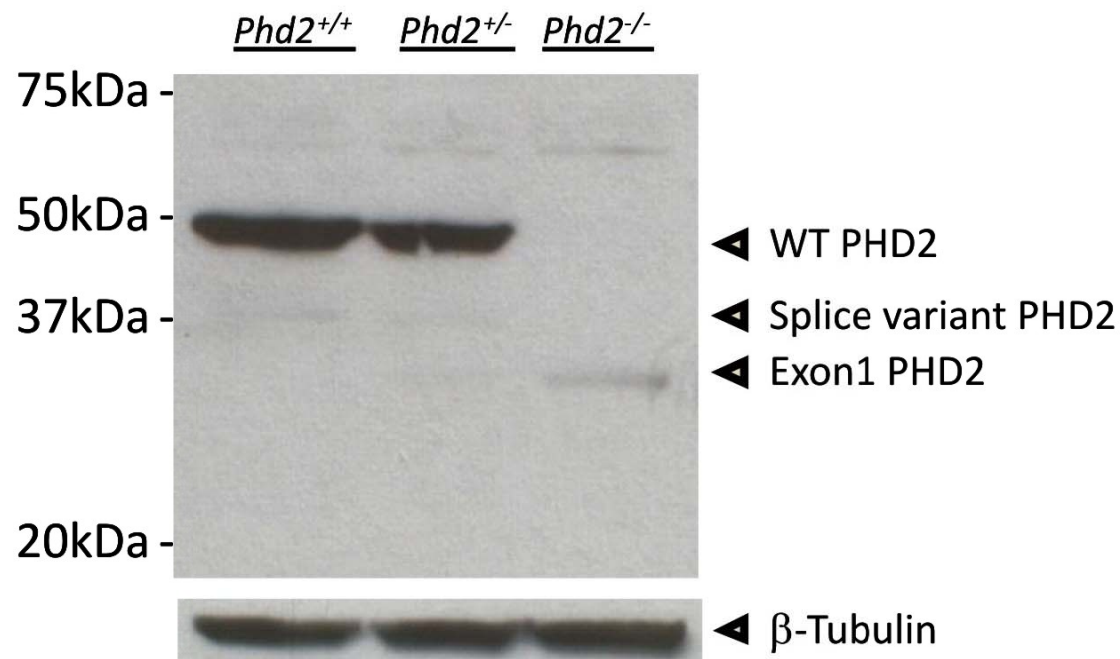

**Supplementary Figure 2:** Proteins were isolated from embryos (*PGKCre x Phd2<sup>lox/lox</sup>*) at E12.5 and western blot analysis was performed on protein extracts (30  $\mu$ g total protein). The anti mouse-Phd2 antibody detects the N-terminal end of the protein (Cell Signaling). A truncated Phd2 protein (exon1) could be detected in the *Phd2*<sup>-/-</sup> as well as in the *Phd2*<sup>+/-</sup> embryos.  $\beta$ -tubulin served as loading control.
